# Supplementary material for: Making All the Right Connections: Curriculum Design Helps Teachers See the Bigger Picture that Students Experience, Then See the Logical Connections.
Source: HighWire-hosted journal article supplement (doi:10.1101/gr.127597.111), 2005-01-01
Supplement: supplemental_data_revision.pdf [file supplemental_data_revision.pdf]

### Supplemental data

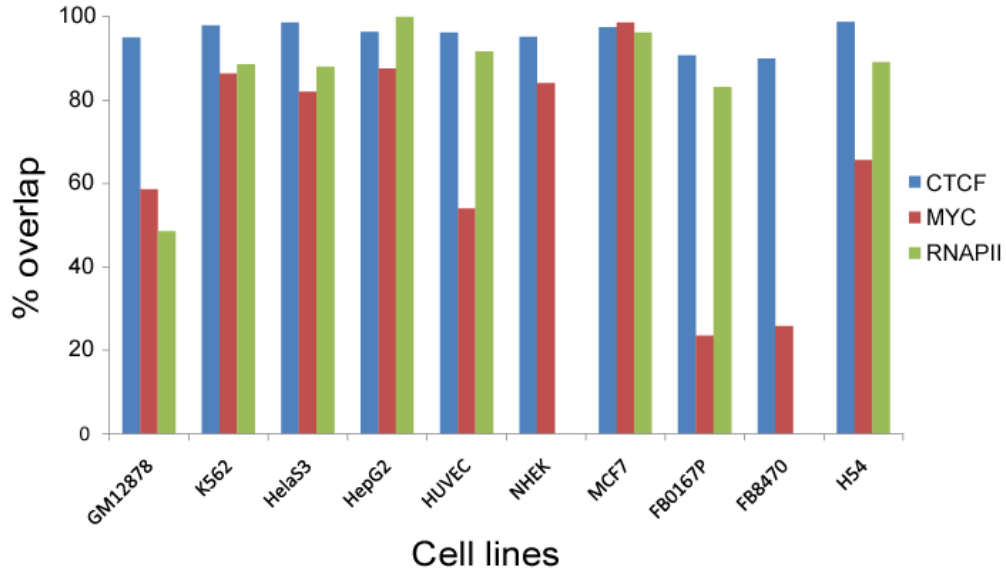

**Supplemental Figure S1.** Overlap analysis between two biological replicates of ChIP-seq data for each factor in each cell line. The top 50,000 CTCF, 15,000 MYC, and 30,000 Pol2 binding sites from one replicate were compared with the top 65,000, 30,000, and 50,000 binding sites from the other replicate, respectively. The Y-axis shows percent overlap between replicates for the cell types indicated on the X-axis. Overlap values for RNAPII are not shown for NHEK and FB8470 because only one replicate was used for NHEK, and no data was generated for RNAPII in FB8470. 2 cases of lower replicate overlap in the case of MYC was likely due to low MYC RNA expression levels as observed in array data (not shown). For consistent data processing we processed these two samples (MYC FB0167P and FB8470) in the same manner as the other data sets. Importantly, peak calling with these datasets with lower replicate overlap does not necessarily overestimate MYC targets because our peak calling program normalizes for total read depth internally.

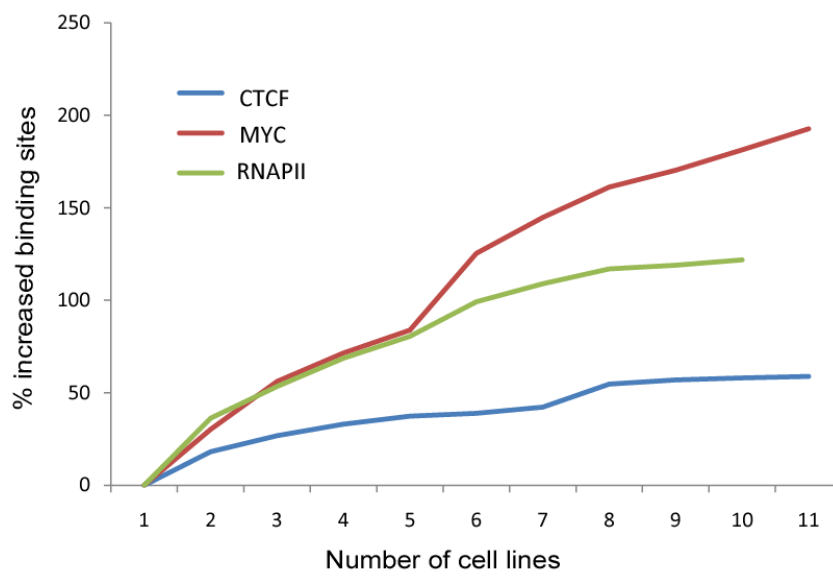

**Supplemental Figure S2.** Increasing numbers of CTCF, MYC, and RNAPII binding sites in the human genome identified by sequencing additional cell types. For each factor, cell types were first sorted in order of highest to lowest number of binding sites. The number of new binding sites found with each additional cell type was determined using overlap analysis, and plotted as a percentage on the Y-axis.

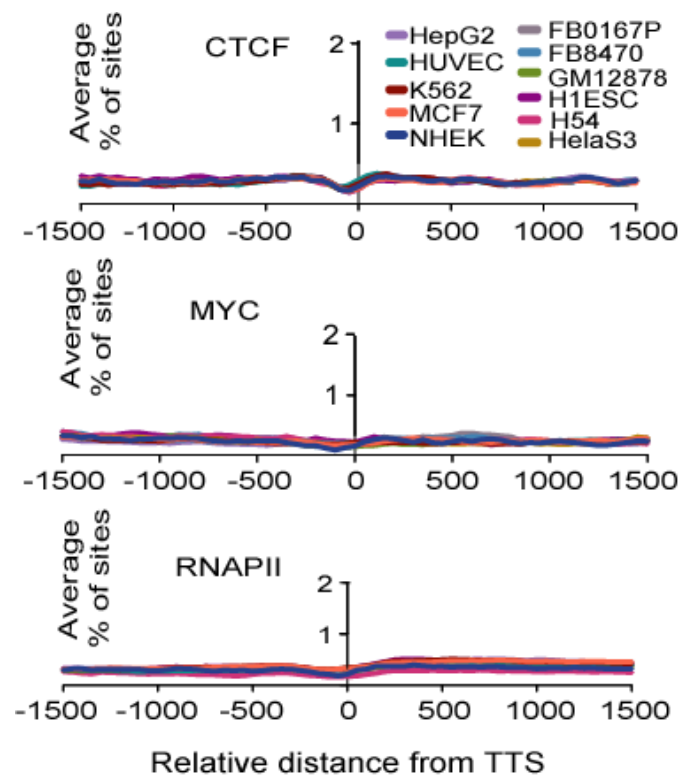

**Supplemental Figure S3.** The average genome-wide binding profiles of CTCF, MYC, and RNAPII around transcription termination sites (TTS). Average profiles were generated in the same manner as for Fig. 2A.

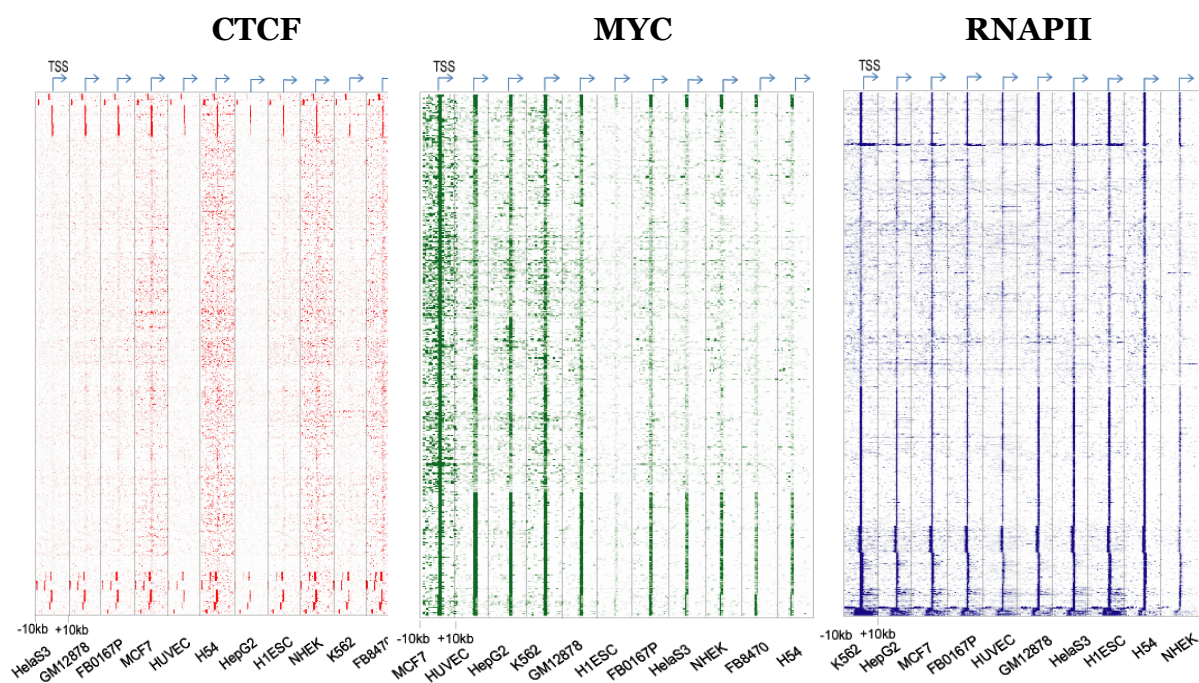

**Supplemental Figure S4.** Patterns of CTCF, MYC and RNAPII occupancy around genes. The heat map shows normalized occupancy scores for each gene with available data (rows) within  $\pm 10$  kb from TSS (columns are 100 bp bins). Arrow indicates TSS and direction of transcription. For each factor, data in the first listed cell line was clustered using K-means clustering and data for the other cell lines are displayed in the same order. The ordering of genes is not the same for the 3 factors. The number of genes listed in the Y-axis is 13,610 for CTCF, 10,440 for MYC, and 13,000 for RNAPII.

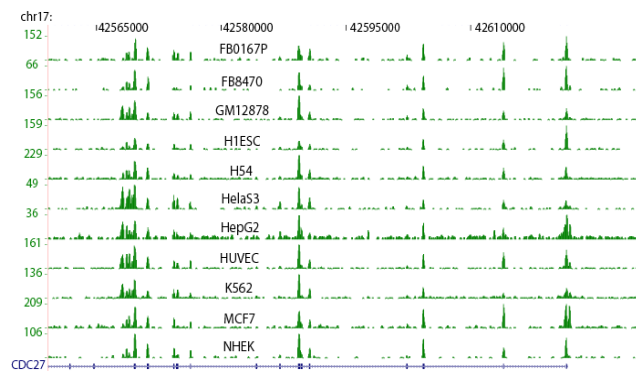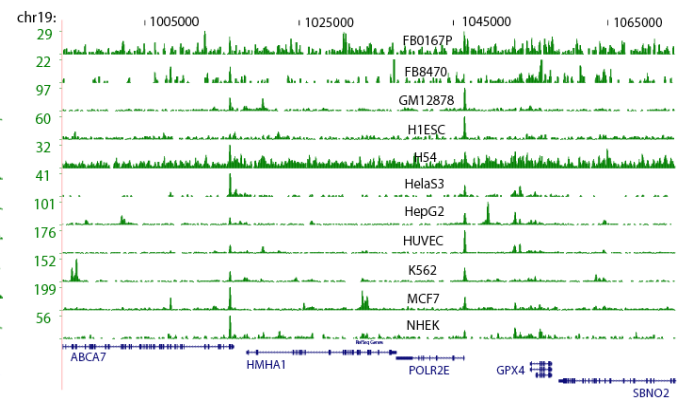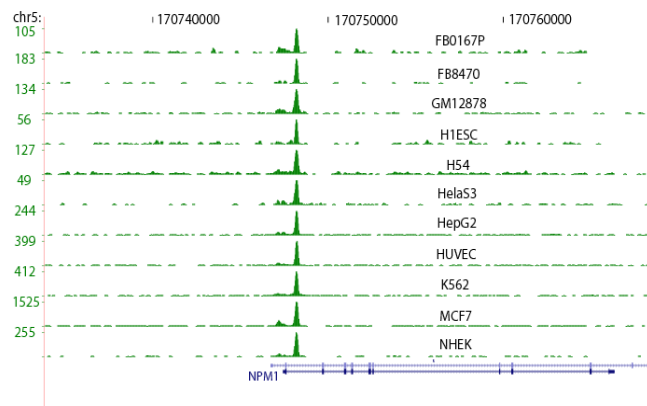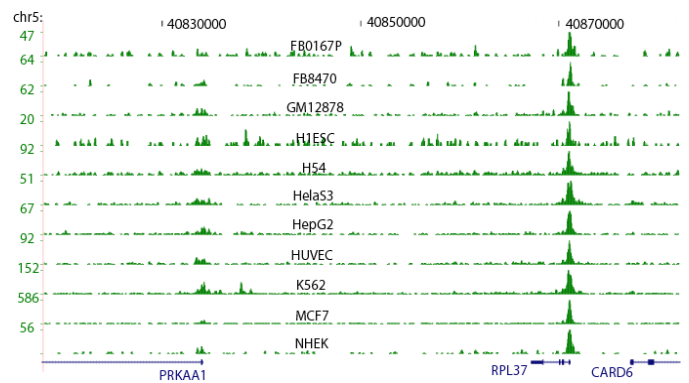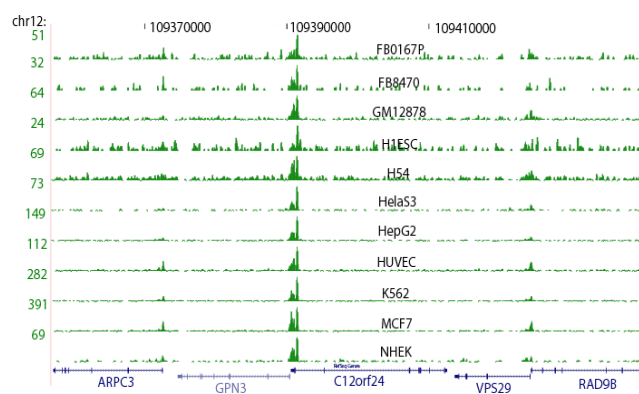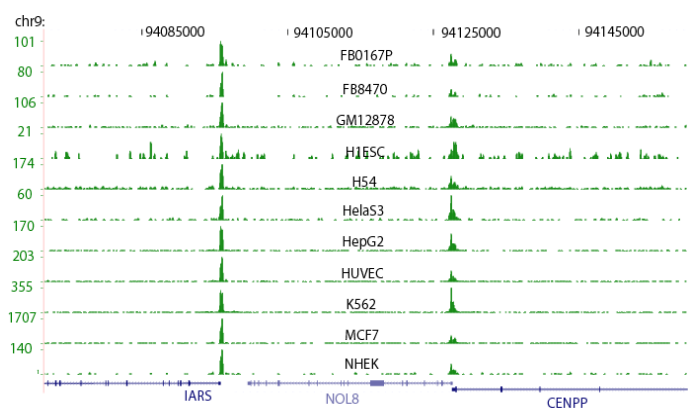

**Supplemental Figure S5.** Well-conserved binding sites of MYC in all cell types including H1ESCs.

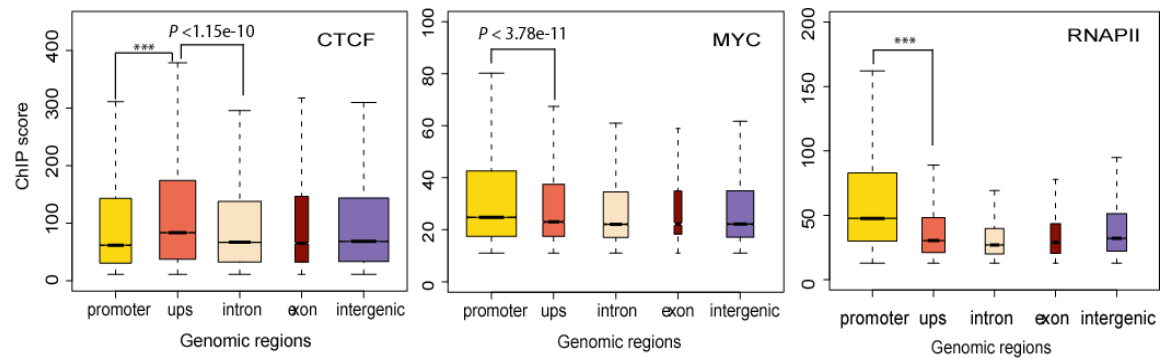

**Supplemental Figure S6.** Box plots showing ChIP-seq score distribution of CTCF, MYC, and RNAPII binding sites in 5 different genomic regions across all cell types. MYC and RNAPII binding sites in promoters had significantly higher ChIP scores than other genomic regions, whereas CTCF had higher ChIP scores in upstream regions. *P*-value was calculated by Wilcoxon rank sum test. Three asterisks (\*\*\*) indicate a *P*-value of zero.

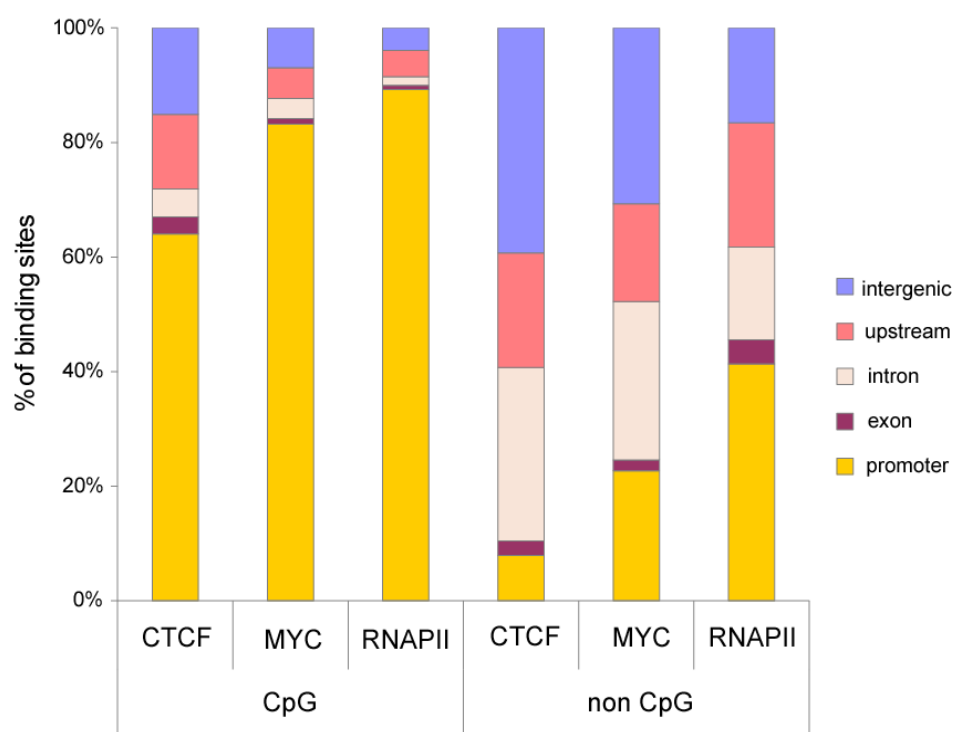

**Supplemental Figure S7** The distribution of CpG and non-CpG binding sites of CTCF, MYC, and RNAPII in 5 different genomic regions.

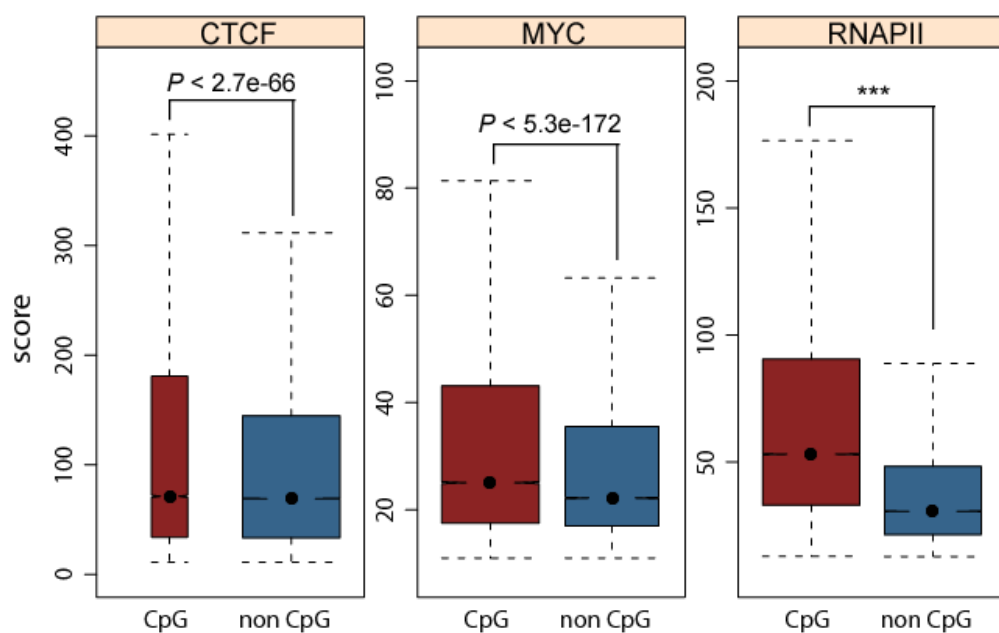

**Supplemental Figure S8.** MYC and RNAPII binding sites show significantly higher occupancy scores in CpG islands than in non-CpG regions. *P*-value was calculated by the Wilcoxon rank sum test. Three asterisks (\*\*\*) indicate a *P*-value of zero.



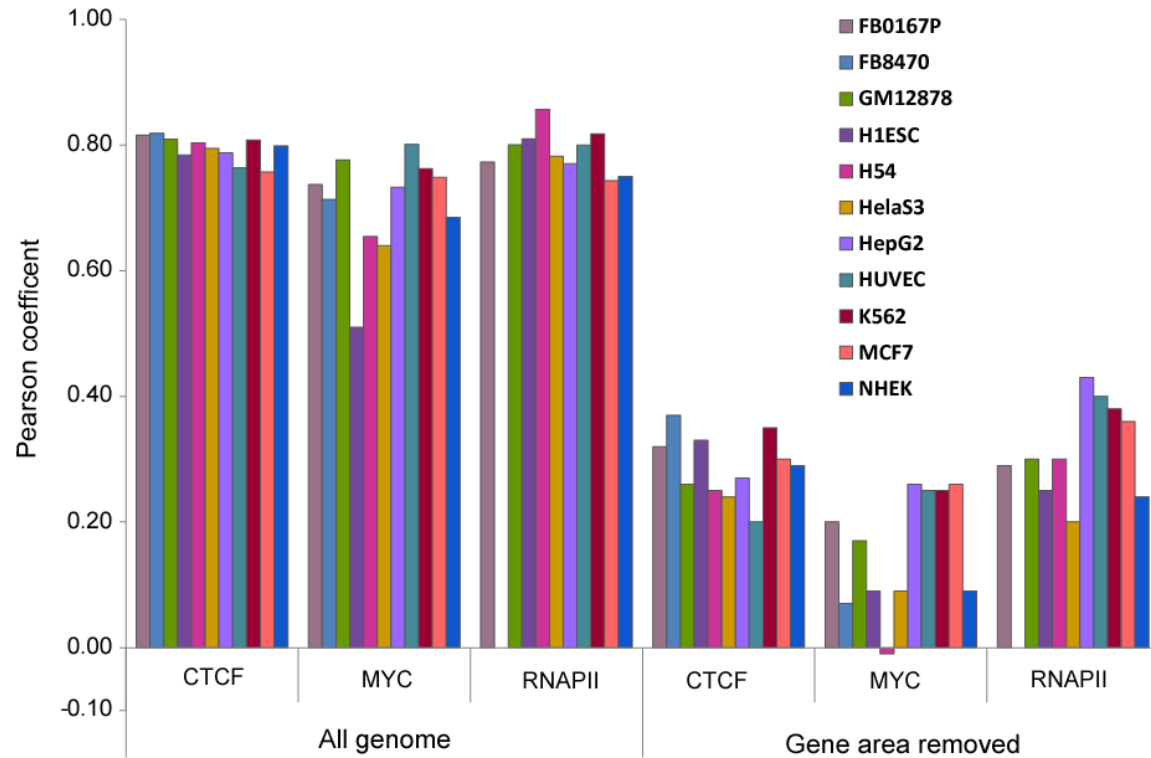

**Supplemental Figure S9.** Pearson correlation coefficients between the number of CTCF, MYC, and RNAPII binding sites and gene density (plotted on the Y-axis). Removing all binding sites of CTCF, MYC, and RNAPII up to 20 kb away from genes still showed a positive correlation. A negative control dataset generated by random permutation of data showed no positive correlation (all values at zero, not shown).

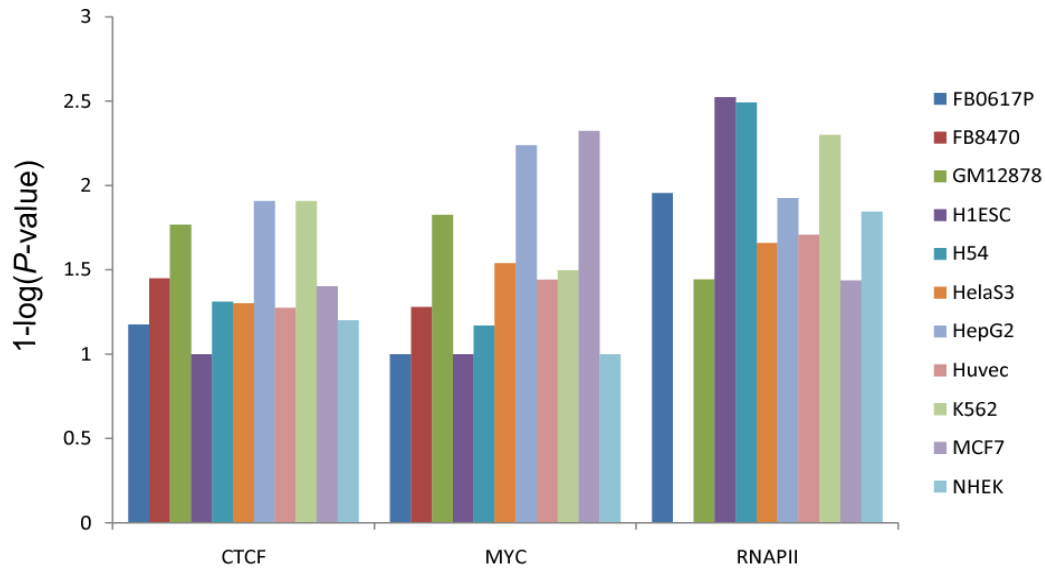

**Supplemental Figure S10.** TF binding in bidirectional promoters activates both genes equally, regardless of its binding distance from transcription start site of genes. A value of 3 on the Y-axis indicates  $P$ -value of 0.01, with lower values indicating higher  $P$ -values.  $P$ -values were calculated by the binomial distribution function. The null hypothesis was that the binding of a factor in a bidirectional promoter is equally likely to regulate both genes to the same extent, resulting in similar expression levels. The high  $P$ -values fail to reject the null hypothesis.

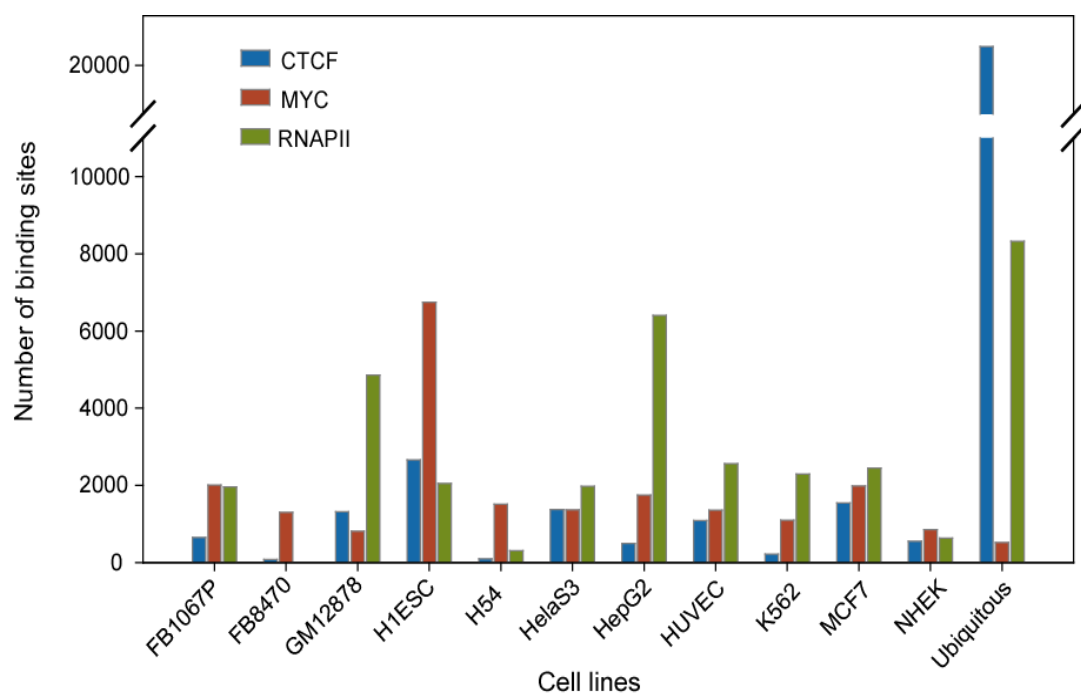

**Supplemental Figure S11.** The number of tissue-specific binding sites of CTCF, MYC, and RNAPII across the genome in different cell types.

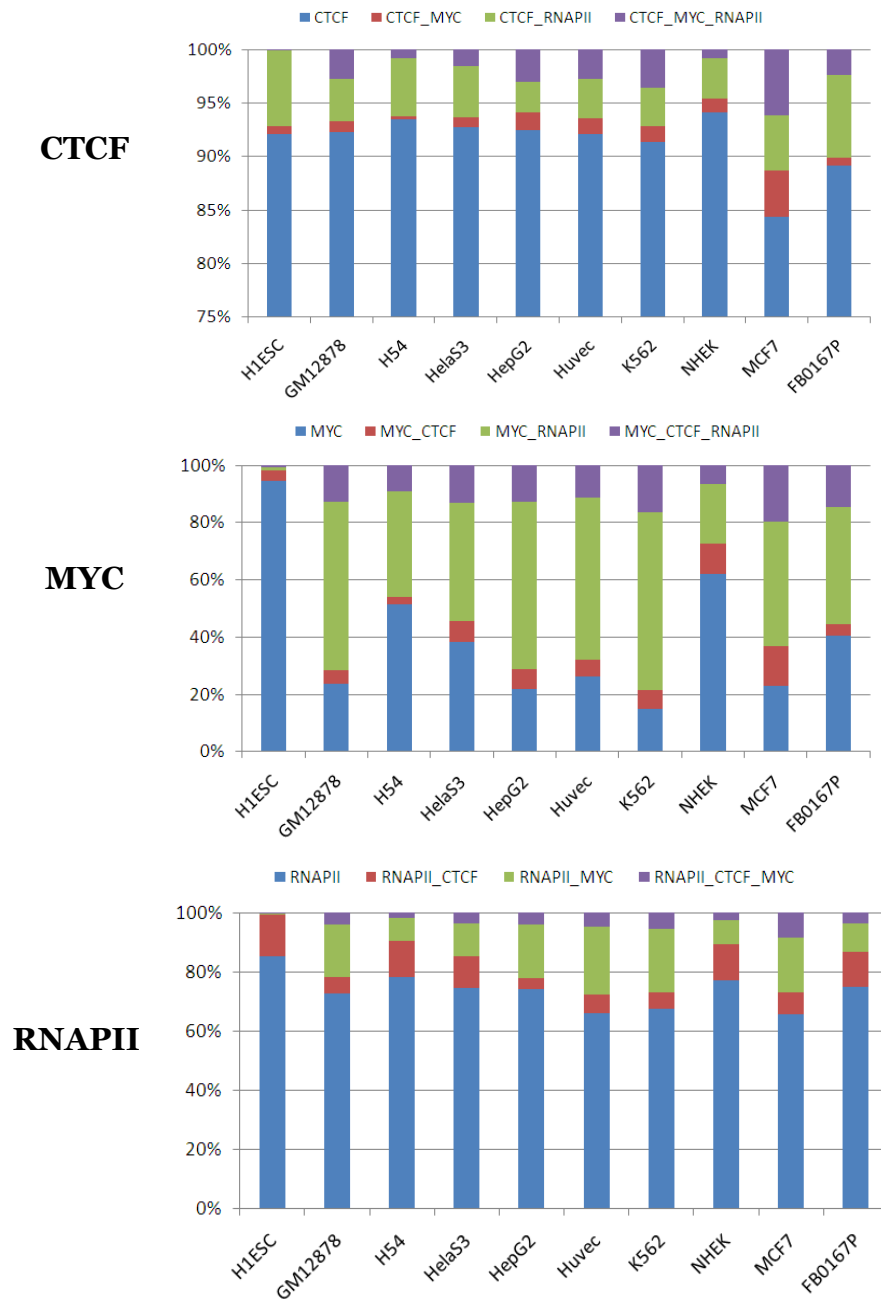

**Supplemental Figure S12.** Distribution of single and combinatorial binding sites of CTCF, MYC and RNAPII in different cell types. X-axis shows cell lines and Y-axis represents % binding sites. Y-axis represents % binding sites.

## CTCF

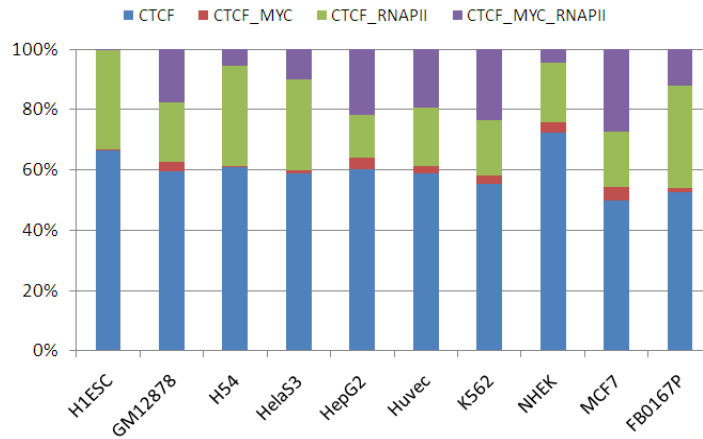

## MYC

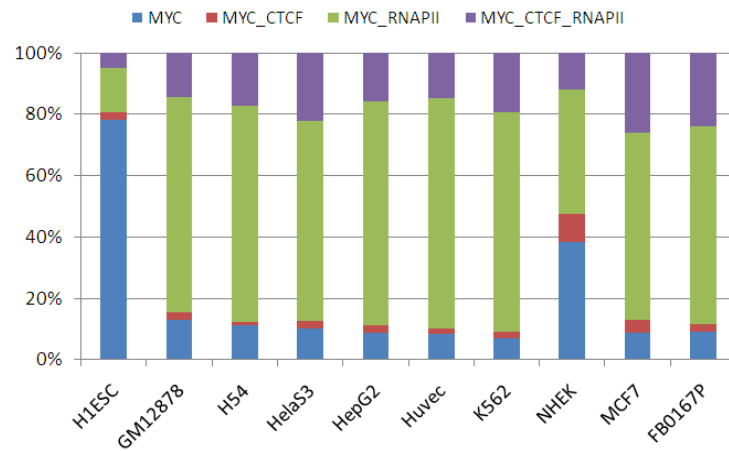

## RNAPII

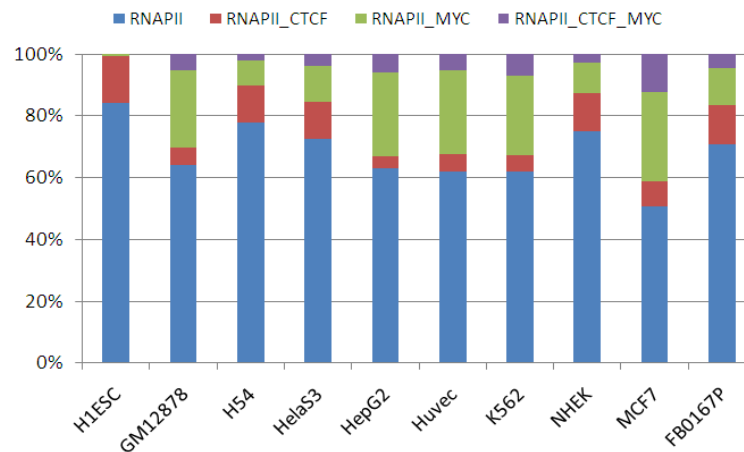

**Supplemental Figure S13.** Distribution of single and combinatorial target genes of CTCF, MYC and RNAPII in different cell types. X-axis shows cell lines and Y-axis represents % target genes. Y-axis indicates % target genes.

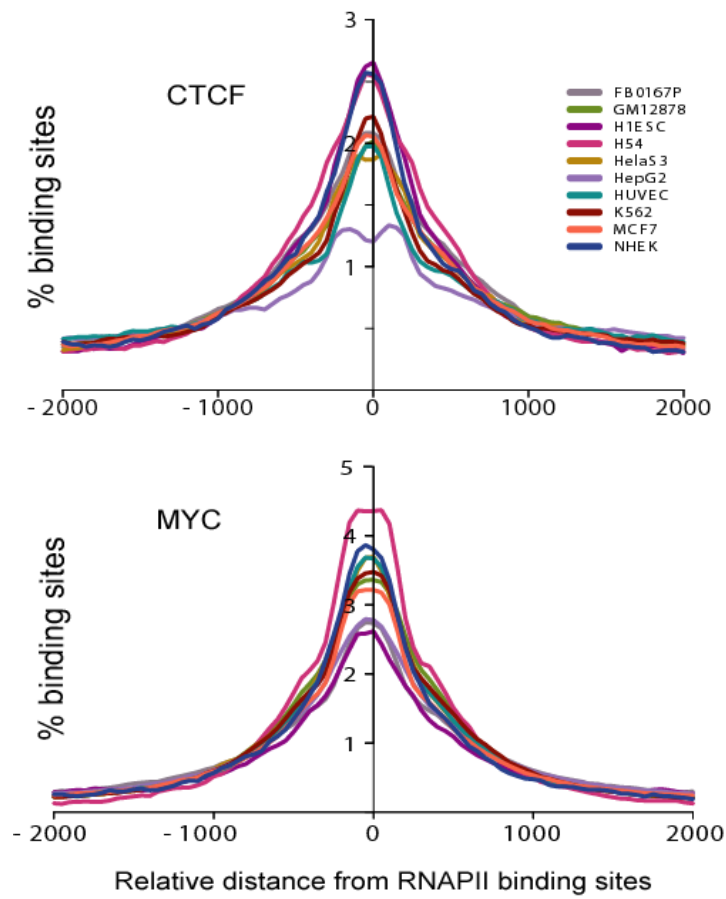

**Supplemental Figure S14.** Average CTCF and MYC binding profiles around RNAPII binding sites.

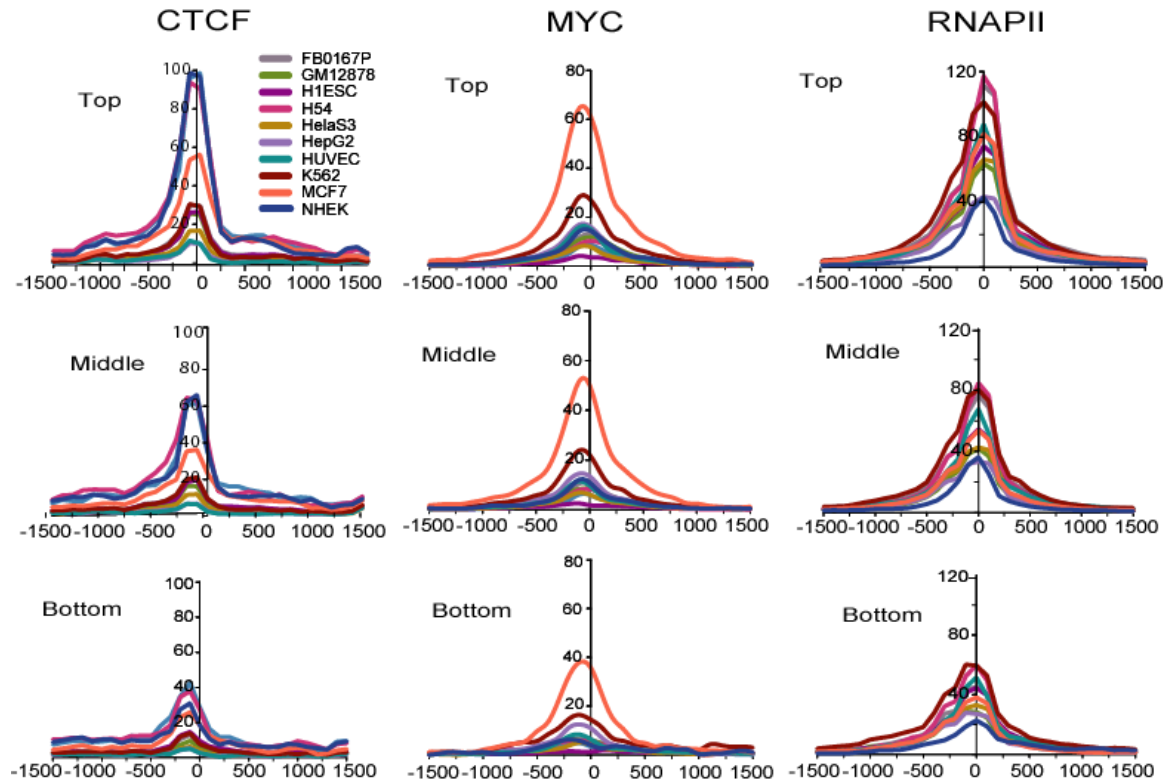

**Supplemental Figure S15.** Binding profiles of CTCF, MYC, and RNAPII in 3 classes of expression groups around TSS. Genes were classified into 3 different expression groups containing the top 33%, middle 33% and bottom 33% based on their expression level. X-axis represents relative distance from TSS. The Y-axis indicates the normalized, input-corrected occupancy score and is therefore comparable across the three expression groups.

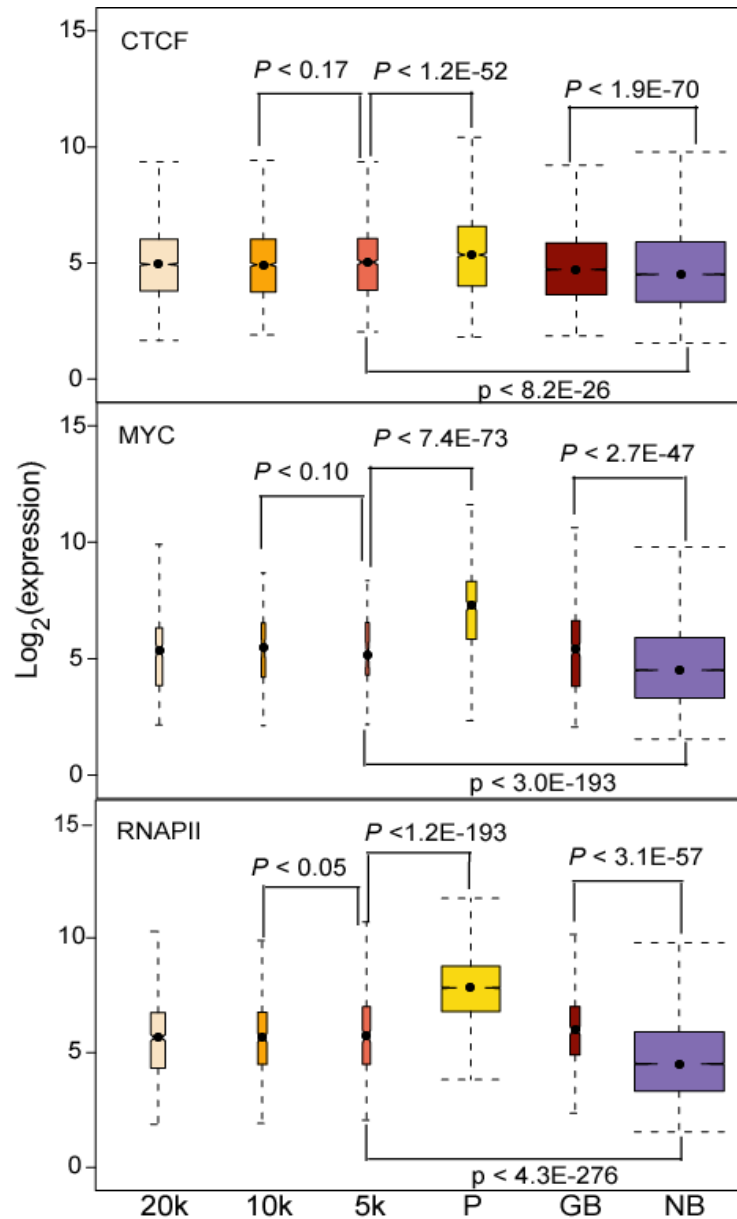

**Supplemental Figure S16.** Location effect of CTCF, MYC, and RNAPII sites on expression of target genes. X-axis represents binding position. 5/10/20K, GB, and NB denote 5, 10 or 20 Kb upstream from TSS, gene body, and non-binding, respectively. Y-axis indicates  $\log_2$  expression.  $P$ -values were calculated by Wilcoxon rank sum test.



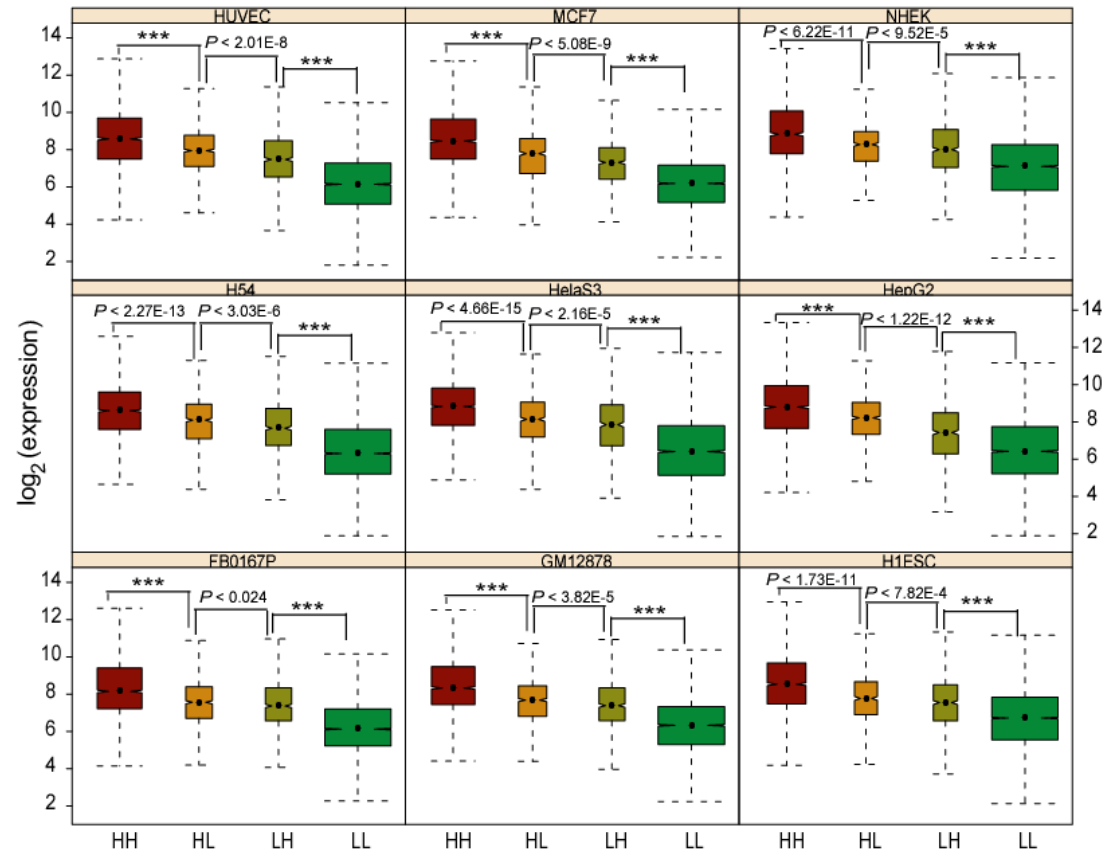

**Supplemental Figure S17.** Box plots showing distribution of gene expression in the 4 RNAPII binding groups for additional cell lines (see Fig. 6B). *P*-values were calculated by Wilcoxon rank sum test. Asterisks indicate a calculated *P*-value of zero.

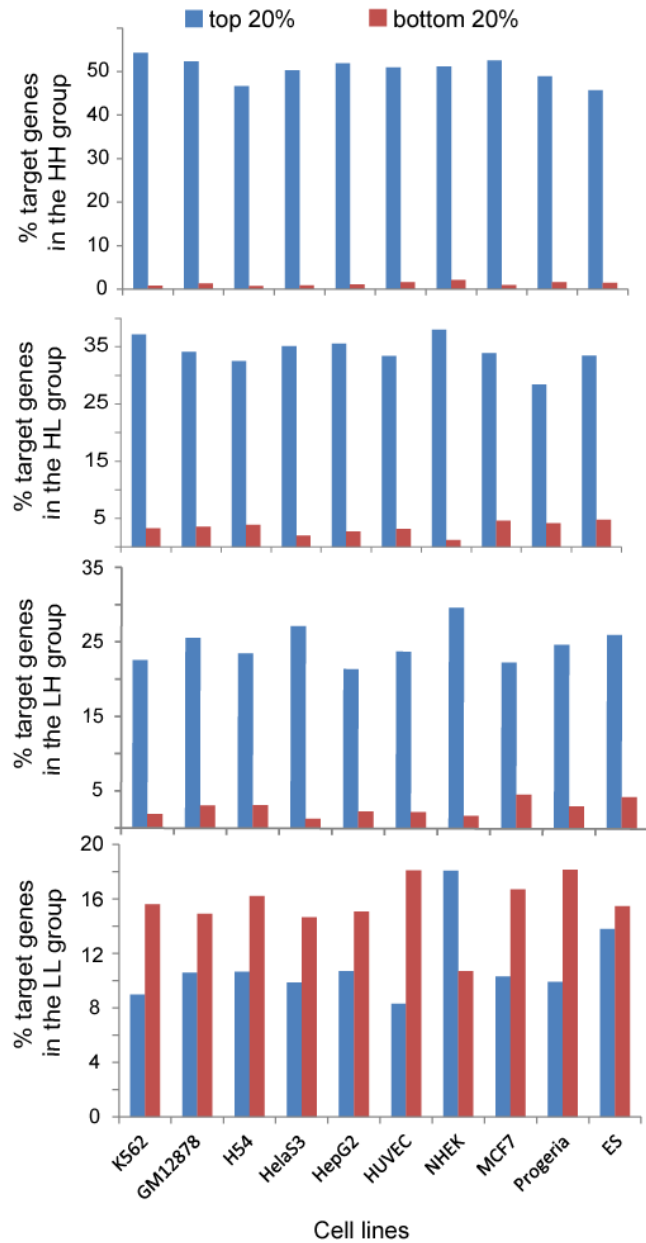

**Supplemental Figure S18.** Proportions of genes in the 4 RNAPII binding groups that are highly expressed (top 20%) as well as low-expressed (bottom 20 %). Y-axis shows the percentage of genes in each group.

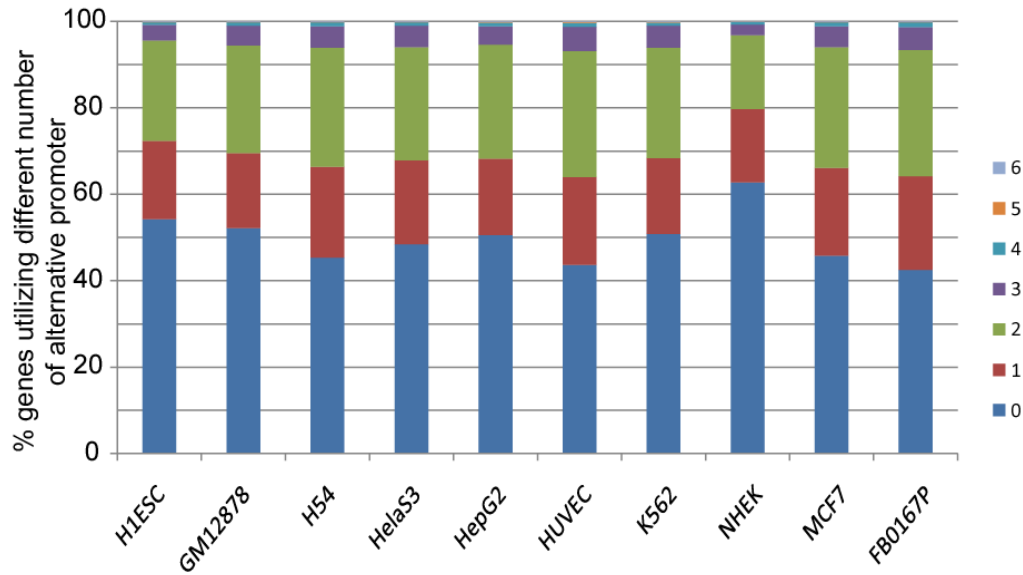

**Supplemental Figure S19.** Percentage of genes utilizing the indicated numbers of alternative promoters among genes containing at least 2 alternative promoters. Each color indicates number of alternative promoters utilized.

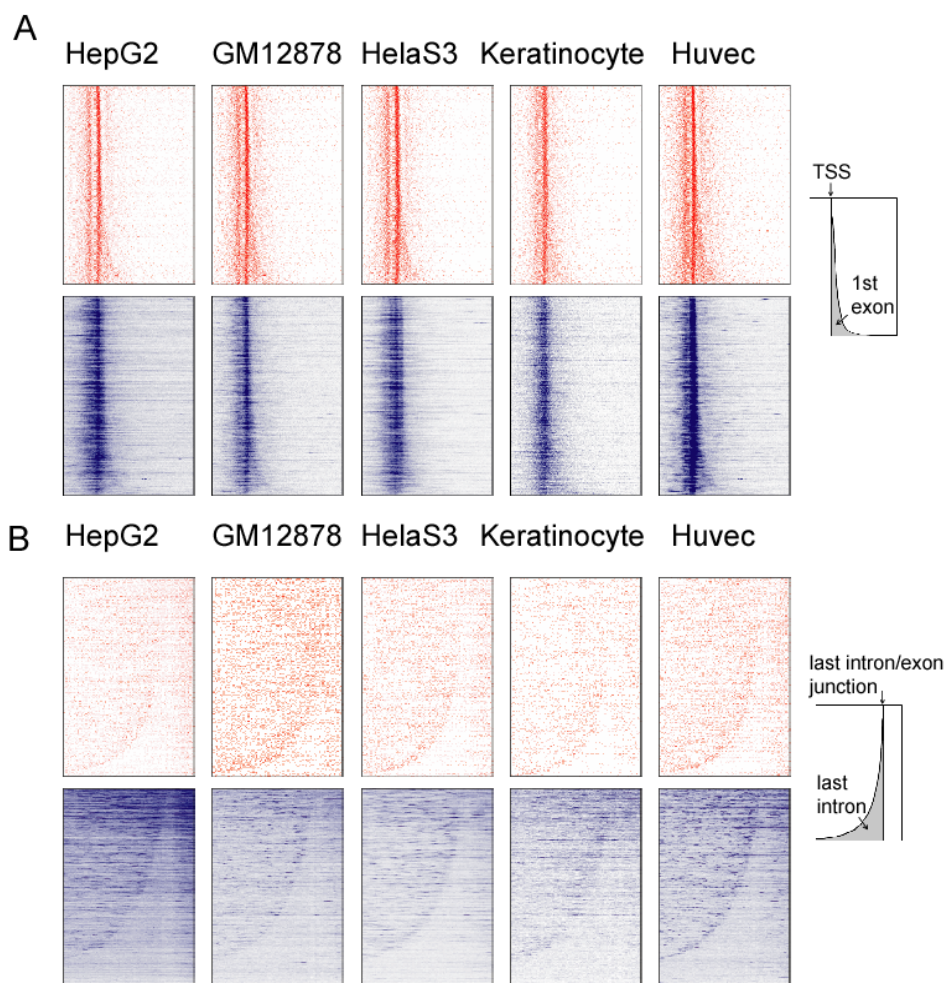

**Supplemental Figure S20.** Pol2 is enriched at first and last exons. (A and B) Pol2 signals at the first and last exon/intron junctions are plotted as in Figure 8.

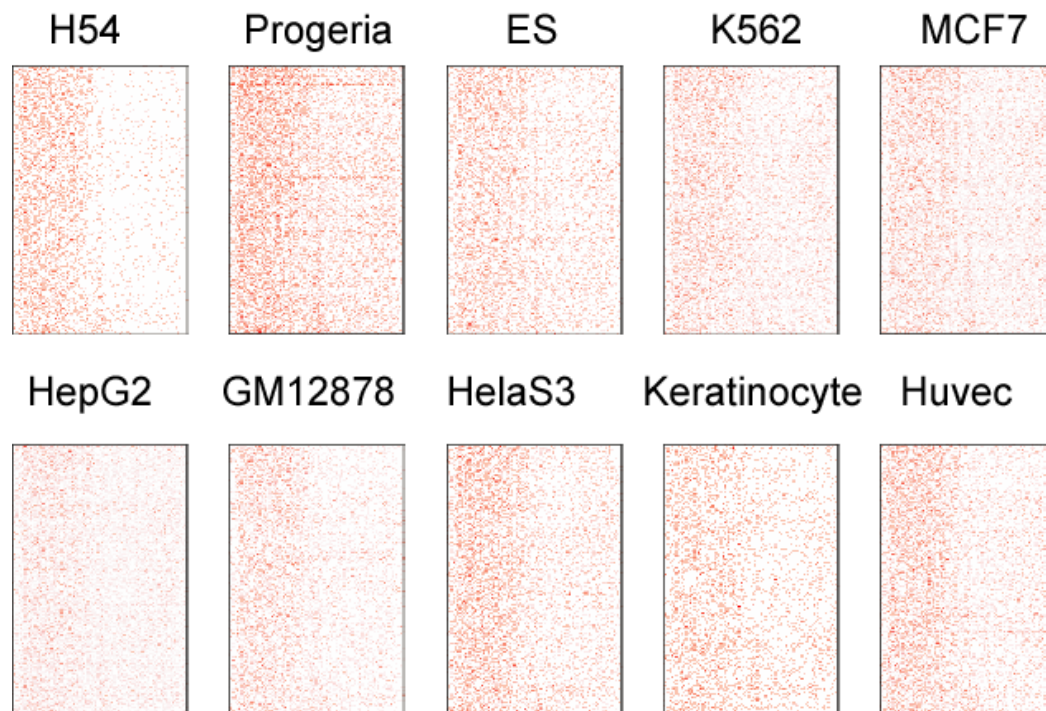

**Supplemental Figure S21.** Pol2 ChIP peaks at constitutive internal exons. Pol2 ChIP peaks (normalized and input-corrected) in 10 cell lines were plotted as in Figure 8.

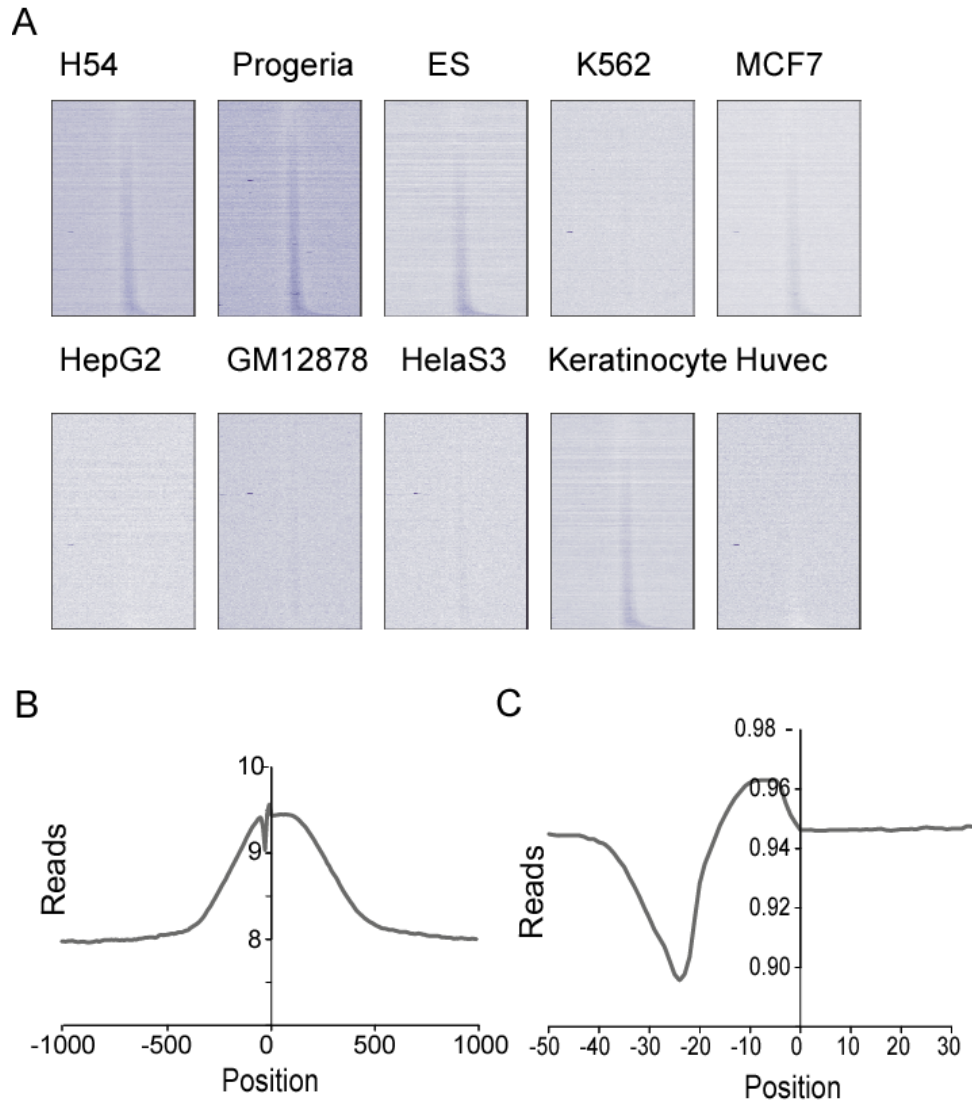

**Supplemental Figure S22.** Input bias at constitutive internal exons. (A) Input reads are plotted around the internal exons as in Figure 8. (B) Exons and their immediate surroundings are more uniquely mappable than regions farther away. All internal exons were aligned to their start sites and mappability scores were assigned into 10 bp bins surrounding the exon start sites. Average of the mappability scores is plotted. (C) Higher resolution view of mappability in the 30 bp region around the exon start sites. Internal exons are aligned as in B and mappability scores are assigned into 1 bp bins.

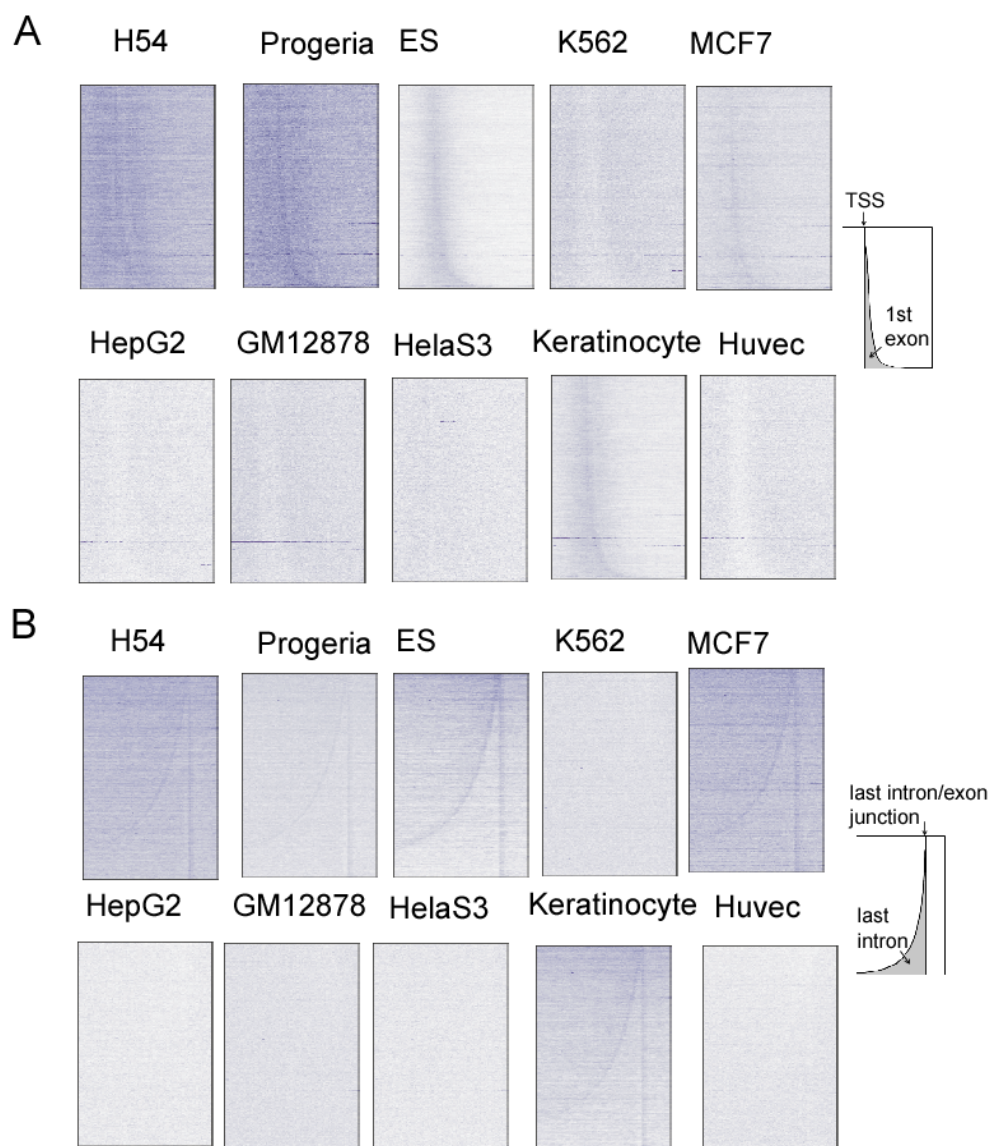

**Supplemental Figure S23.** Input read density at the first and last exon/intron junctions. (A and B) Input reads are plotted at the first and last exon/intron junctions as in Figure 8.



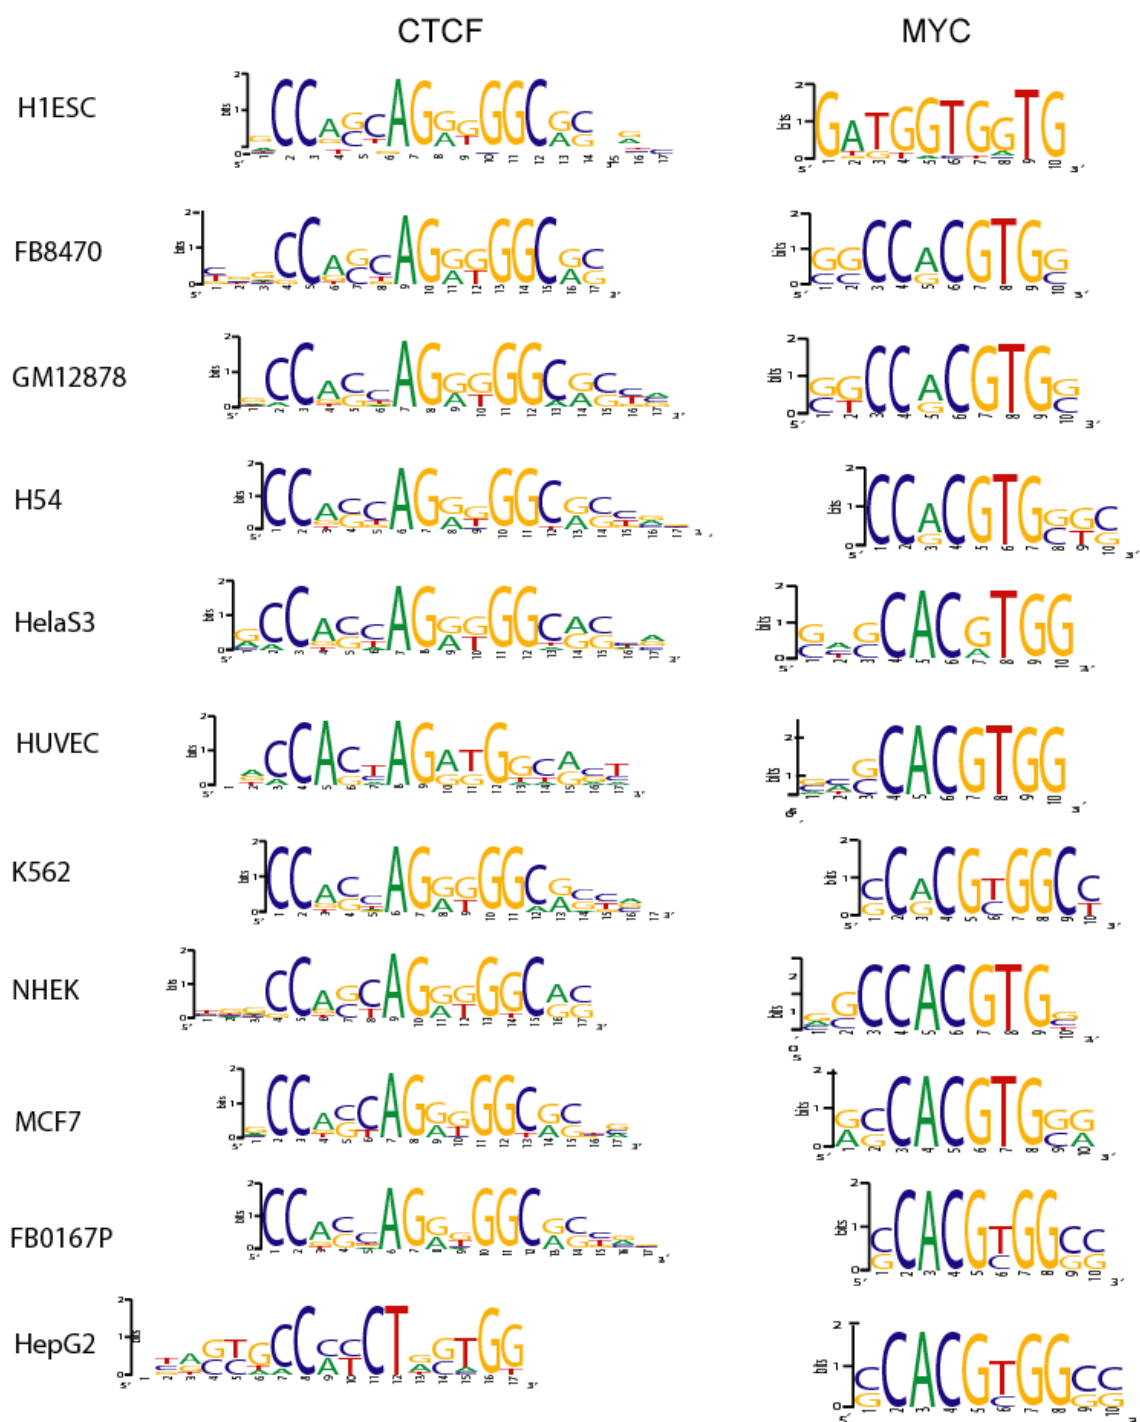

**Supplemental Figure S24.** Motifs discovered from strong binding sites de novo using DME on ChIP-seq peaks. Virtually identical motifs were found in weak and moderate sites (not shown)



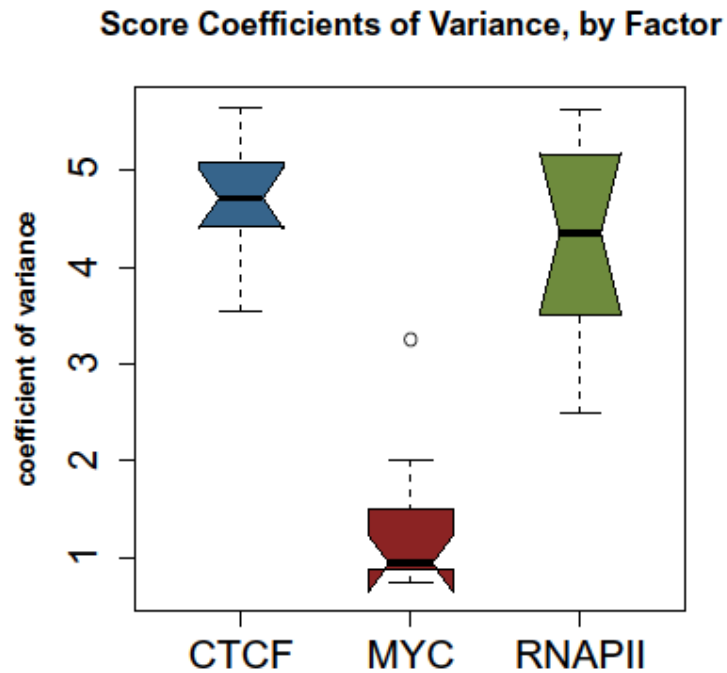

**Supplemental Figure S25.** Distribution of coefficients of variance (standard deviation/mean occupancy score) for input corrected and filtered binding sites before applying target cutoff thresholds for CTCF, MYC and RNAPII (11, 11 and 10 cell lines respectively). The qualitative impression that MYC binding sites exhibit generally weaker signal is reflected in the lower CoVs for most MYC cell lines.

**Supplemental Table S1.** The number of independent biological replicates and aligned reads for all ChIP-seq as well as input data sets.

|  |         | Input      |                 | CTCF       |                 | MYC           |                 | RNAPII     |                 |
|--|---------|------------|-----------------|------------|-----------------|---------------|-----------------|------------|-----------------|
|  |         | Replicates | # Aligned Reads | Replicates | # Aligned Reads | Replicates    | # Aligned Reads | Replicates | # Aligned Reads |
|  | FB0167P | 1          | 31,510,516      | 2          | 46,874,291      | 2             | 25,230,535      | 2          | 49,082,997      |
|  | FB8470  | 1          | 40,979,563      | 2          | 39,266,345      | 2             | 10,955,174      |            |                 |
|  | GM12878 | 1          | 16,568,390      | 3          | 30,830,198      | 2             | 27,762,943      | 2          | 41,965,165      |
|  | H1ESC   | 2          | 21,110,780      | 1          | 14,563,540      | 1             | 19,025,332      | 1          | 22,033,234      |
|  | H54     | 1          | 51,821,256      | 2          | 104,978,274     | 2             | 58,004,041      | 2          | 36,683,532      |
|  | HelaS3  | 1          | 11,798,703      | 2          | 28,322,770      | 2             | 14,228,304      | 2          | 18,851,779      |
|  | HepG2   | 1          | 11,929,226      | 2          | 14,063,412      | 3             | 25,203,575      | 4          | 36,930,350      |
|  | HUVEC   | 1          | 14,898,732      | 2          | 22,204,482      | 2             | 30,953,678      | 2          | 28,353,668      |
|  | K562    | 1          | 16,493,115      | 3          | 27,270,533      | 3             | 34,160,398      | 2          | 40,791,878      |
|  | MCF7    | 1          | 29,404,931      | 2          | 45,850,125      | 2             | 80,691,282      | 2          | 58,363,979      |
|  | NHEK    | 1          | 26,350,143      | 2          | 26,316,271      | 1             | 13,234,802      | 1          | 20,058,797      |
|  | Average |            | 24,805,941      |            | 36,412,749      |               | 30,859,097      |            | 35,311,538      |
|  | Total   |            | 241,354,839     |            | 353,665,950     |               | 314,219,529     |            | 304,032,382     |
|  |         |            |                 | Average    |                 | 31,109,556    |                 |            |                 |
|  |         |            |                 | Total      |                 | 1,213,272,700 |                 |            |                 |

**Supplemental Table S2.** The Number of CTCF, MYC, and RNAPII binding sites at the selected score threshold in diverse cell lines

|                | CTCF  |       |                | RNAPII |       |                | MYC   |       |               |
|----------------|-------|-------|----------------|--------|-------|----------------|-------|-------|---------------|
|                | Top % | Score | # Sites        | Top %  | Score | # Sites        | Top % | Score | # Sites       |
| <b>FB0167P</b> | 3.5   | 10.97 | <b>46,424</b>  | 2      | 18.46 | <b>36,325</b>  | 0.5   | 17.72 | <b>7,100</b>  |
| <b>FB8470</b>  | 4.2   | 33.22 | <b>35,652</b>  |        |       |                | 0.5   | 12.65 | <b>4,661</b>  |
| <b>GM12878</b> | 3.7   | 10.97 | <b>50,366</b>  | 2      | 20.06 | <b>31,118</b>  | 0.39  | 10.97 | <b>8,134</b>  |
| <b>H1ESC</b>   | 4     | 21.25 | <b>40,890</b>  | 2      | 25.94 | <b>25,089</b>  | 0.5   | 12.83 | <b>9,222</b>  |
| <b>H54</b>     | 4     | 29.68 | <b>43,501</b>  | 2      | 20.78 | <b>23,069</b>  | 0.26  | 10.97 | <b>3,938</b>  |
| <b>HelaS3</b>  | 3.8   | 10.97 | <b>53,731</b>  | 2      | 16.15 | <b>29,249</b>  | 0.48  | 10.97 | <b>6,949</b>  |
| <b>HepG2</b>   | 4     | 16.66 | <b>43,234</b>  | 2      | 13.64 | <b>42,550</b>  | 0.5   | 13.14 | <b>11,623</b> |
| <b>HUVEC</b>   | 3.6   | 10.97 | <b>45,175</b>  | 2      | 21.82 | <b>33,924</b>  | 0.5   | 12.82 | <b>11,862</b> |
| <b>K562</b>    | 4     | 30.54 | <b>37,289</b>  | 2      | 28.36 | <b>31,560</b>  | 0.5   | 19.91 | <b>9,685</b>  |
| <b>MCF7</b>    | 4     | 22.98 | <b>45,705</b>  | 2      | 12.73 | <b>41,224</b>  | 0.92  | 33.22 | <b>15,435</b> |
| <b>NHEK</b>    | 7.2   | 33.22 | <b>38,009</b>  | 2      | 26.28 | <b>13,511</b>  | 0.5   | 16.85 | <b>4,697</b>  |
| <b>Average</b> |       |       | <b>43,355</b>  |        |       | <b>30,762</b>  |       |       | <b>8,482</b>  |
| <b>Total</b>   |       |       | <b>479,976</b> |        |       | <b>307,619</b> |       |       | <b>93,306</b> |

**Supplemental Table S3.** Functional categories enriched among the ubiquitous binding sites of CTCF, MYC, and RNAPII, reported by the DAVID web-based functional annotation program. Enrichment and FDR Q-Values based on the hypergeometric distribution analyzing overlap between genes in the GO Biological Process ontology term and the list of genes bound by RNAPII (8167), MYC (185) or CTCF (3321) across all cell types. Genes bound by CTCF in all cell types showed enrichment in a variety of lipid metabolic processes, while genes ubiquitously bound by RNAPII or MYC showed enrichment in constitutive housekeeping functions such as translation and protein degradation.

| GO Biological Process Term                      | Total Genes | RNAPII    |             |           | MYC       |             |           | CTCF      |             |           |
|-------------------------------------------------|-------------|-----------|-------------|-----------|-----------|-------------|-----------|-----------|-------------|-----------|
|                                                 |             | Gene Hits | Fold Enrich | FDR Q-Val | Gene Hits | Fold Enrich | FDR Q-Val | Gene Hits | Fold Enrich | FDR Q-Val |
| translational elongation                        | 105         | 92        | 1.8         | 0.0%      | 32        | 7.7         | 0.0%      |           |             |           |
| ribosome biogenesis                             | 135         | 113       | 1.7         | 0.0%      | 22        | 5.4         | 0.0%      |           |             |           |
| nuclear export                                  | 62          | 55        | 1.8         | 0.0%      |           |             |           |           |             |           |
| protein folding                                 | 176         | 131       | 1.5         | 0.0%      |           |             |           |           |             |           |
| regulation of ubiquitin-protein ligase activity | 81          | 68        | 1.7         | 0.0%      |           |             |           |           |             |           |
| RNA processing                                  | 582         |           |             |           | 80        | 3.5         | 0.0%      |           |             |           |
| ubiquitin-dependent protein catabolic process   | 273         |           |             |           | 14        | 4.6         | 0.1%      |           |             |           |
| RNA elongation from RNA polymerase II promoter  | 49          | 46        | 2.0         | 0.0%      |           |             |           |           |             |           |
| cellular alkene metabolic process               | 25          |           |             |           |           |             |           | 25        | 1.4         | 1.1%      |
| unsaturated fatty acid biosynthetic process     | 38          |           |             |           |           |             |           | 35        | 1.3         | 6.4%      |
| icosanoid biosynthetic process                  | 35          |           |             |           |           |             |           | 32        | 1.2         | 10.7%     |
| leukotriene metabolic process                   | 24          |           |             |           |           |             |           | 24        | 1.4         | 1.4%      |
| glutathione biosynthetic process                | 12          |           |             |           |           |             |           | 12        | 1.4         | 23.7%     |
| release of cytochrome c from mitochondria       | 22          |           |             |           |           |             |           | 20        | 1.2         | 34.8%     |
| neutral amino acid transport                    | 20          |           |             |           |           |             |           | 18        | 1.2         | 45.3%     |

**Supplemental Table S4.** Functional categories enriched among target genes occupied by combinations of CTCF, MYC, and RNAPII, as reported by the DAVID web-based functional annotation program. Values are fold enrichment; hypergeometric distribution-based FDR Q-Values for all enrichments are < 5%.

[illegible]
